# Supplementary material for: Actin dynamics provides membrane tension to merge fusing vesicles into the plasma membrane
Source: PubMed Central journal article supplement (PMC5013665; doi:10.1038/ncomms12604), 2016-08-31
Supplement: ncomms12604-s1.pdf [file ncomms12604-s1.pdf]

**a**  $\Omega$ -exo-endocytosis

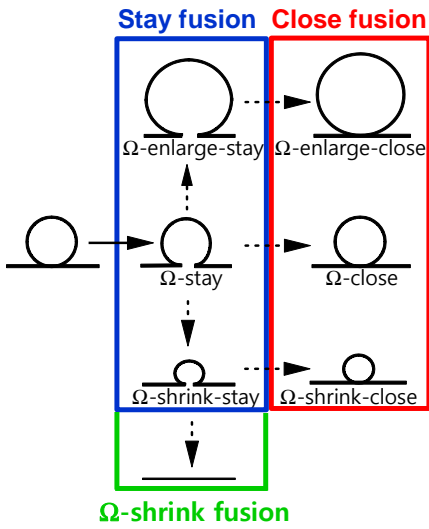

**b**

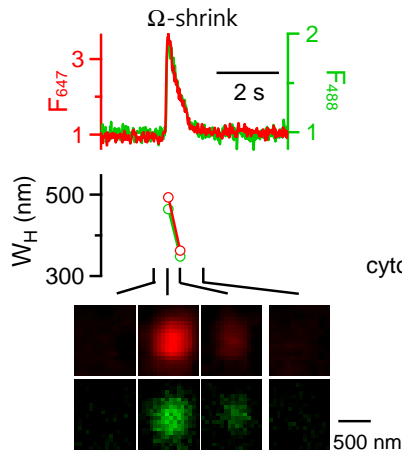

**c**

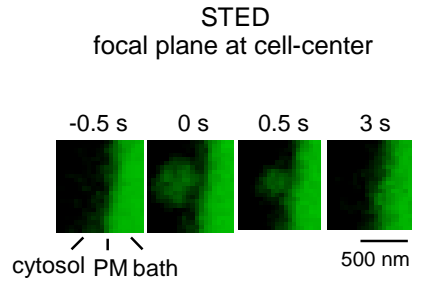

**d** Stay fusion

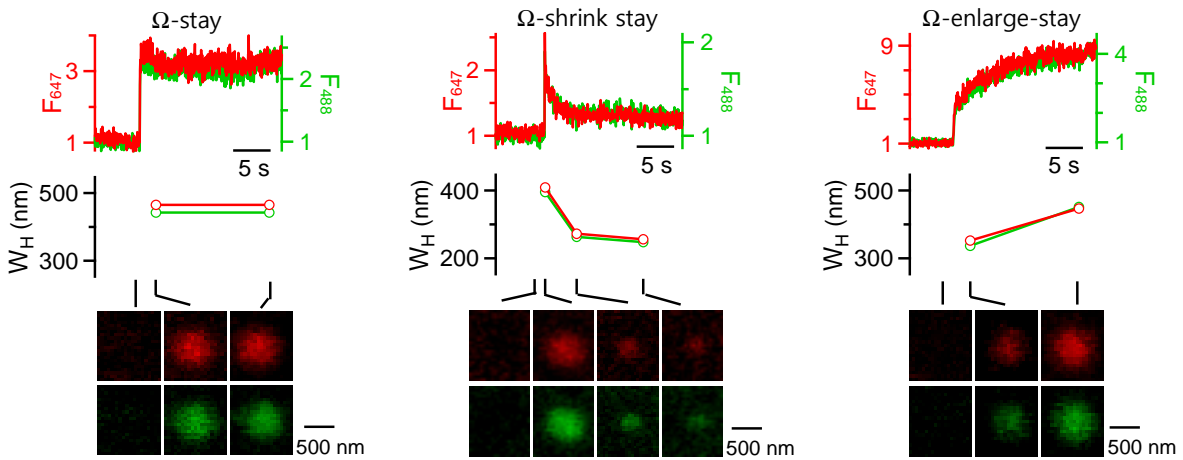

**e** Close fusion

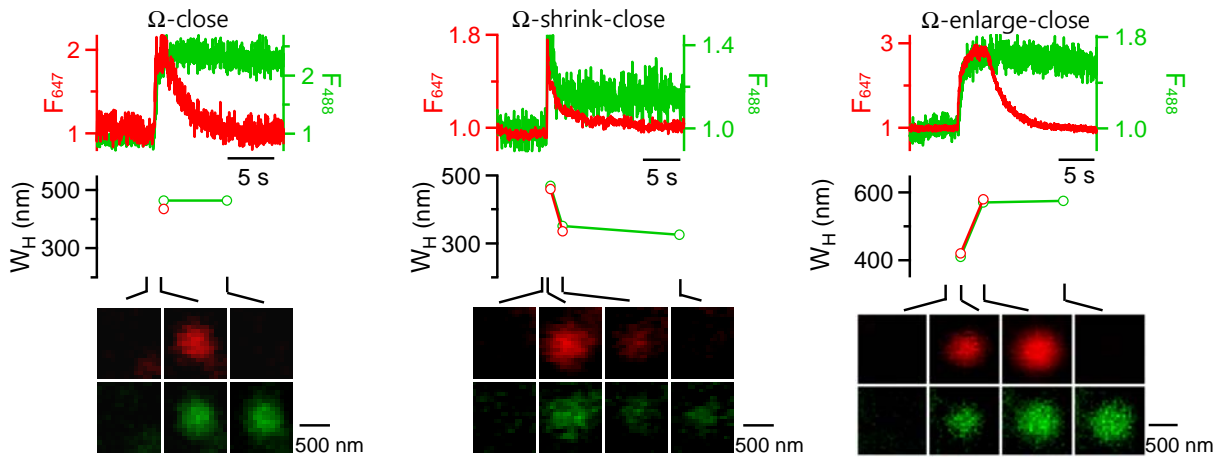

2  
3 **Supplementary Figure 1.** Seven fusion modes can be summarized into three categories:  $\Omega$ -  
4 shrink, stay and close fusion in bovine chromaffin cells

5 (a) Schematic drawings of a model called  $\Omega$ -exo-endocytosis with seven fusion modes, the name  
6 of which is written under each configuration. These seven fusion modes can be regrouped  
7 into three categories,  $\Omega$ -shrink, stay, and close fusion as described below. The dotted arrows  
8 indicated the events may or may not take place.

9 **1.  $\Omega$ -shrink fusion** (green box) refers to a fusion mode in which the fusion-generated  $\Omega$ -  
10 profile shrinks until undetectable.

11 **2. Stay fusion** (blue box) refers to three individual fusion modes, in which the fusion-  
12 generated  $\Omega$ -profiles are maintained with an open pore while the size of the  $\Omega$ -profile may  
13 change. These three individual fusion modes are  $\Omega$ -stay,  $\Omega$ -enlarge-stay, and  $\Omega$ -shrink-stay  
14 fusion, as defined below.

15  $\Omega$ -stay: the  $\Omega$ -profile remains unchanged in its size with an opened pore after fusion.

16  $\Omega$ -shrink-stay: the  $\Omega$ -profile shrinks to some extent with an opened pore.

17  $\Omega$ -enlarge-stay: the  $\Omega$ -profile enlarges with an opened pore.

18 **3. Close fusion** (red box) refers to stay fusion that is followed by pore closure. It includes  
19 three individual fusion modes,  $\Omega$ -close,  $\Omega$ -enlarge-close, and  $\Omega$ -shrink-close, as defined below.

20  $\Omega$ -close: the fusion-generated  $\Omega$ -profile remains unchanged in its size but closes its pore  
21 sometime after fusion.

22  $\Omega$ -shrink-close: the fusion-generated  $\Omega$ -profile shrinks its size to some extent and closes  
23 its pore sometime after fusion.

24  $\Omega$ -enlarge-close: the fusion-generated  $\Omega$ -profile enlarges its size and closes its pore  
25 sometime after fusion.

26 (b)  $\Omega$ -shrink: A647 fluorescence intensity ( $F_{647}$ , red), A488 fluorescence intensity ( $F_{488}$ , green),  
27  $W_H$ , and sampled images (average of 4 frames) at times indicated (lines), are plotted versus  
28 time for a spot undergoing  $\Omega$ -shrink fusion induced by  $\text{Train}_{2\text{Hz}}$ . The images were collected  
29 every 20-40 ms at the confocal cell-bottom setting with A647 and A488 in the bath excited  
30 strongly and weakly, respectively.  $F_{647}$  or  $F_{488}$  was normalized to its mean background value  
31 before spots appeared. This plot is identical to Fig. 1c. The settings of this plot also apply to  
32 panels d-e.

33 (c) Sampled  $\Omega$ -shrink fusion observed at a focal plane of the STED microscope above the cell-  
34 bottom ( $>2\ \mu\text{m}$ ) where the plasma membrane was approximately in parallel with the  
35 microscopic  $z$  axis (side view). The time is relative to the time the spot appeared. The bath  
36 containing fluorescent A488, the cytosol (dark), and the plasma membrane (PM) are labelled  
37 in the first panel.

38 (d) Stay fusion:  $F_{647}$ ,  $F_{488}$ ,  $W_H$ , and sampled images (average of 5-20 frames) at times indicated  
39 (lines) are plotted versus time for three spots undergoing  $\Omega$ -stay (left),  $\Omega$ -shrink-stay  
40 (middle), and  $\Omega$ -enlarge-stay (right) fusion, as induced by  $\text{Train}_{2\text{Hz}}$ .

41 (e) Close fusion:  $F_{647}$ ,  $F_{488}$ ,  $W_H$ , and sampled images (average of 10-16 frames) at times  
42 indicated (lines) are plotted versus time for three spots undergoing  $\Omega$ -close (left),  $\Omega$ -shrink-  
43 close (middle), and  $\Omega$ -enlarge-close (right) fusion.

44  
45  
46

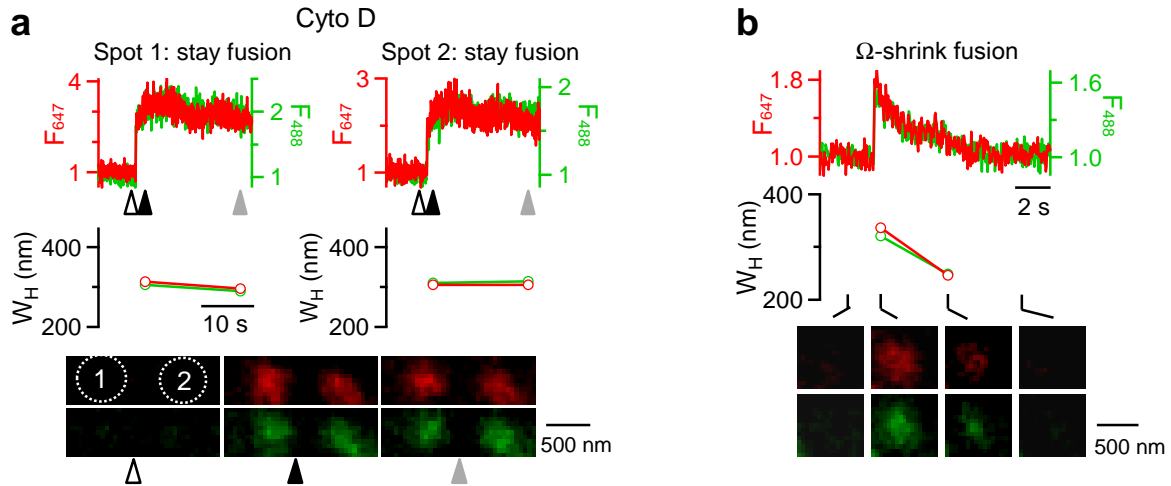

47  
 48 **Supplementary Figure 2.** Cytochalasin D inhibits  $\Omega$ -shrink fusion  
 49 (a) An example showing more spots (two neighbouring spots, 1 & 2) undergoing stay fusion  
 50 during Train<sub>2Hz</sub> in the presence of cytochalasin D (Cyto D, 4  $\mu$ M, in bath solution). Sampled  
 51 images were taken at times indicated by triangles.  
 52 (b) A spot undergoing  $\Omega$ -shrink fusion in the presence of Cyto D – shrinking rate is slower  
 53 compared to control in Fig. 1d, 1g in the main text.  
 54  
 55  
 56  
 57  
 58  
 59  
 60  
 61  
 62  
 63  
 64  
 65  
 66  
 67  
 68

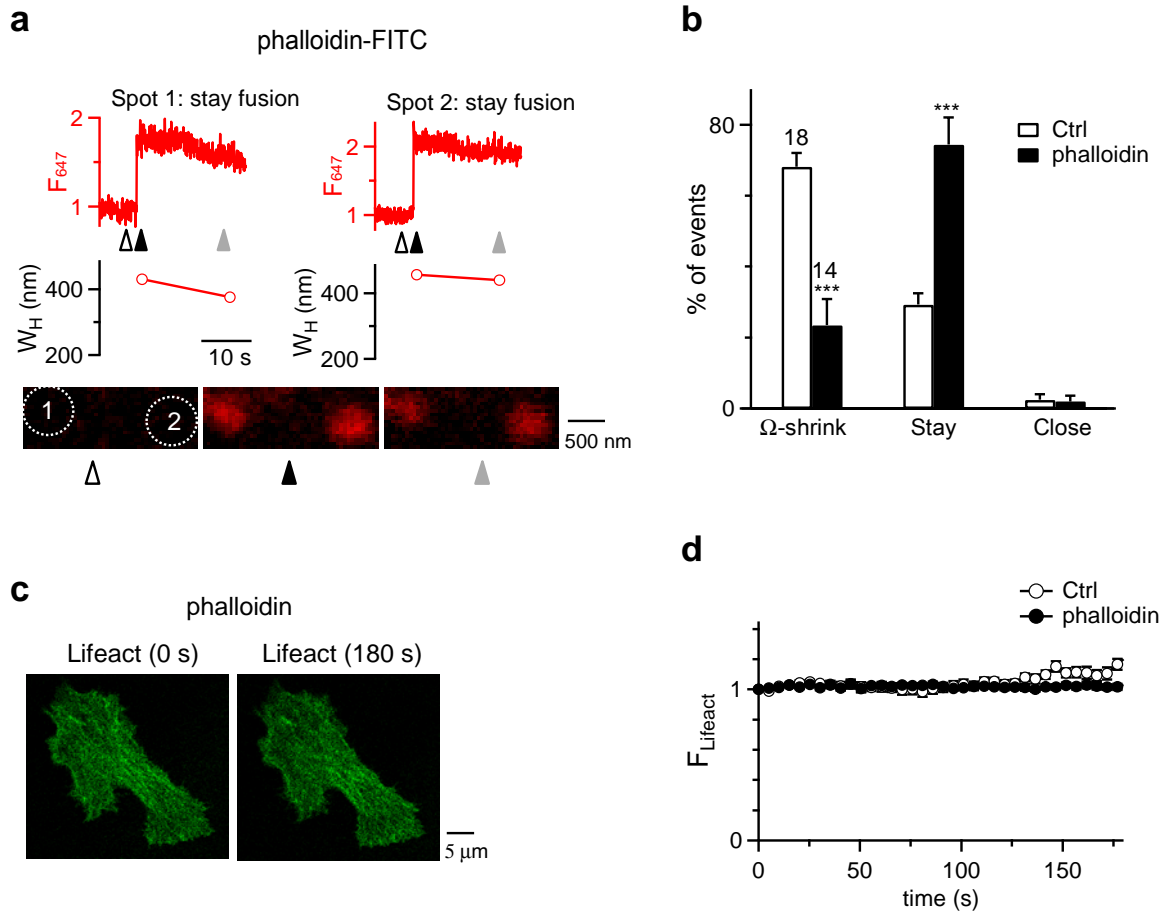

69  
70  
71  
72  
73  
74  
75  
76  
77  
78  
79  
80  
81  
82  
83  
84  
85  
86  
87  
88

**Supplementary Figure 3. Phalloidin inhibits  $\Omega$ -shrink fusion**

- (a) An example showing more spots (two neighbouring spots 1 and 2) undergoing stay fusion during  $\text{Train}_{2\text{Hz}}$  in the presence of phalloidin-FITC ( $1.3 \mu\text{M}$  in the pipette, 2-3 min after whole-cell dialysis).  $F_{647}$  (red) and  $W_H$  and sampled images taken at times indicated by triangles are shown.
- (b) Bar graph showing percentages (mean + s.e.m.) of  $\Omega$ -shrink, stay and close fusion induced by  $\text{Train}_{2\text{Hz}}$  in the presence of  $1.3 \mu\text{M}$  phalloidin-FITC ( $n=14$  cells; total spot number: 111). Control is plotted for comparison (white, same as Fig. 1h,  $n=18$  cells, total spot number: 192 spots). The cell number is also shown at the top of the corresponding bar (applies to other similar plots). \*\*\*:  $P < 0.001$ , unpaired two-tailed Student's t-test.
- (c) Sampled Lifact images at the cell-bottom before (0 s, left) and 180 s after (right) whole-cell dialysis of phalloidin ( $1.3 \mu\text{M}$ ).
- (d) Lifact-TagGFP2 fluorescence ( $F_{Lifact}$ , mean  $\pm$  s.e.m.) at the cell-bottom before (time 0) and during whole-cell dialysis of phalloidin ( $1.3 \mu\text{M}$ , 7 cells).  $F_{Lifact}$  was normalized to the value at time 0.

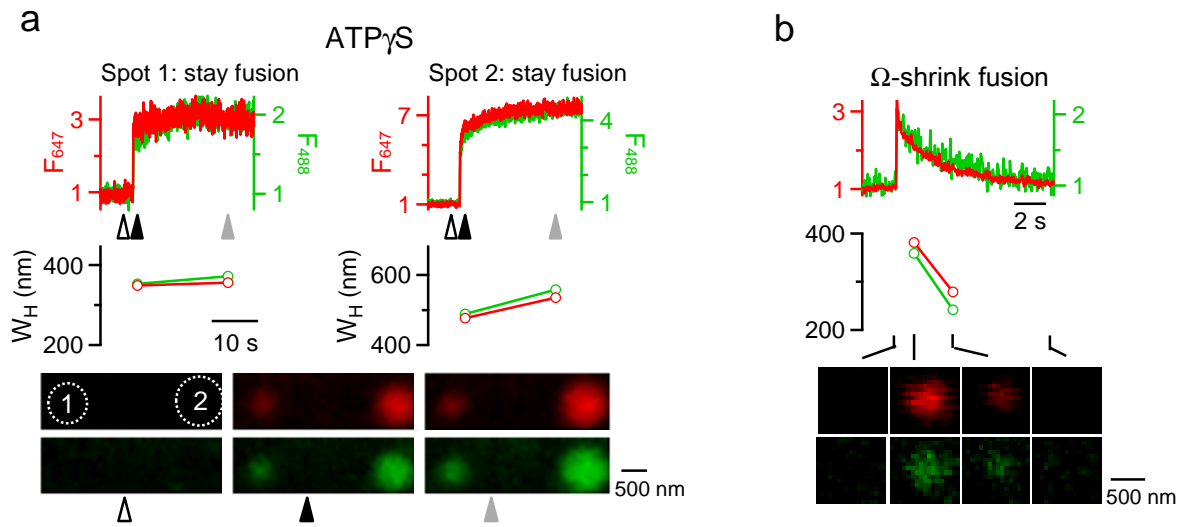

89  
 90 **Supplementary Figure 4. ATP $\gamma$ S inhibits  $\Omega$ -shrink fusion**  
 91 (a) An example showing more spots (two neighbouring spots, 1 & 2) undergoing stay fusion  
 92 during Train<sub>2Hz</sub> in the presence of ATP $\gamma$ S (2 mM, replacing 2 mM ATP in the pipette).  
 93 Sampled images were taken as indicated by triangles.  
 94 (b) A spot undergoing  $\Omega$ -shrink fusion in the presence of ATP $\gamma$ S – shrinking rate is slower  
 95 compared to control in Fig. 1d, 1g in the main text.  
 96

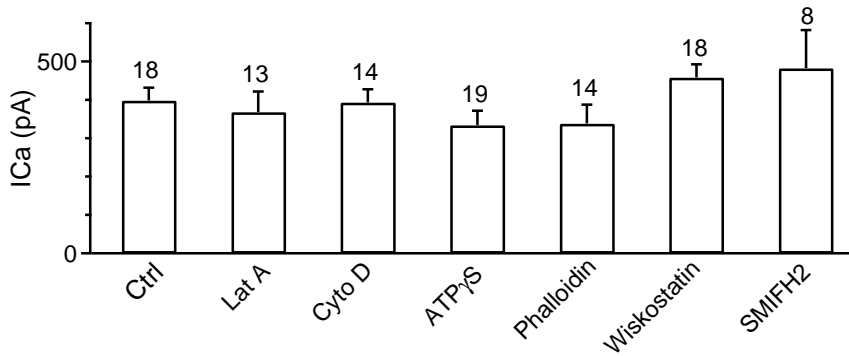

97  
 98 **Supplementary Figure 5.** Lat A, Cyto D, ATPγS, phalloidin, wiskostatin or SMIFH2 treatment  
 99 does not affect ICa

100 The amplitude (mean + s.e.m) of the ICa induced by Train<sub>2Hz</sub> in control (n = 18 cells), in  
 101 the presence of Lat A (3 μM, n = 13 cells, *P* = 0.6151), cytochalasin D (Cyto D,  
 102 4 μM, n = 9 cells, *P* = 0.9171), ATPγS (2 mM, n = 19 cells, *P* = 0.2039), phalloidin-FITC  
 103 (1.3 μM, n = 14 cells, *P* = 0.292), wiskostatin (10 μM, n = 18 cells, *P* = 0.2114) or SMIFH2 (25  
 104 μM, n = 8 cells, *P* = 0.1323). ICa amplitude was measured from the first 50 ms pulse during  
 105 Train<sub>2Hz</sub>. Lat A, Cyto D, wiskostatin and SMIFH2 were applied to the bath for 20 min before ICa  
 106 was measured. Phalloidin-FITC and ATPγS was dialyzed into the cell for ~2 min via a whole-  
 107 cell pipette. All measurements were made within ~2-3 min after whole-cell break-in. They were  
 108 not significantly different (*P* > 0.05; unpaired two-tailed Student's t-test).

109  
 110  
 111  
 112  
 113

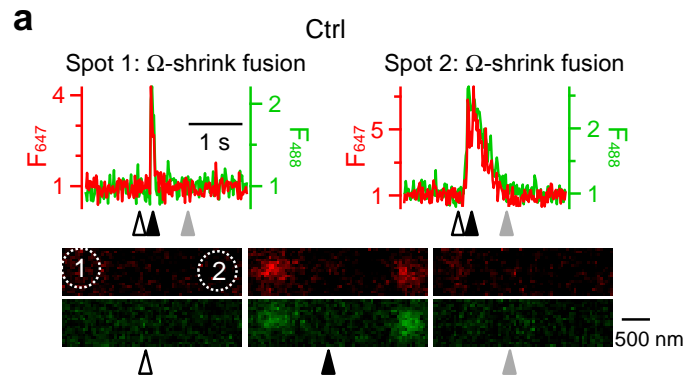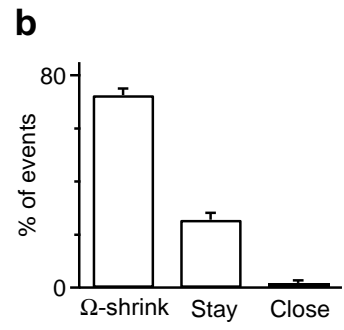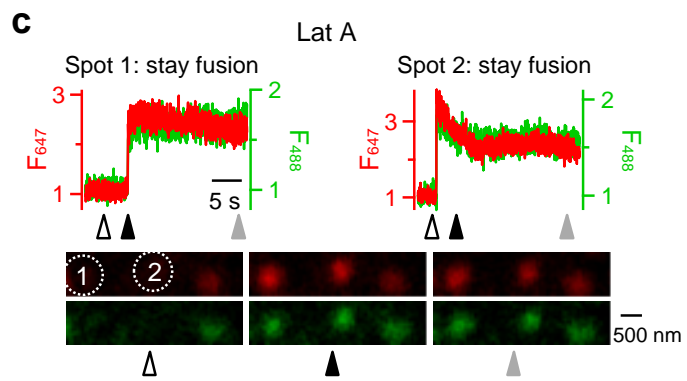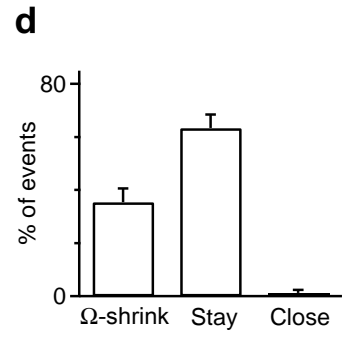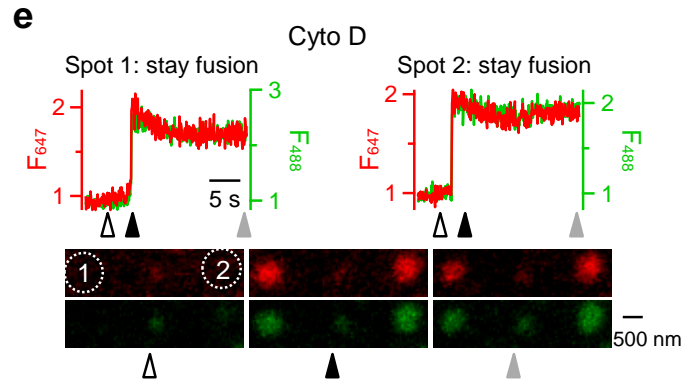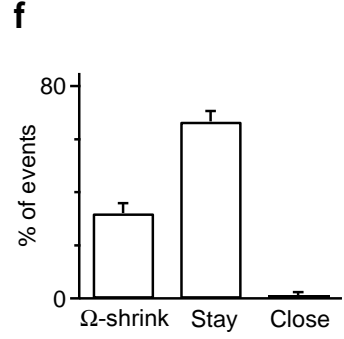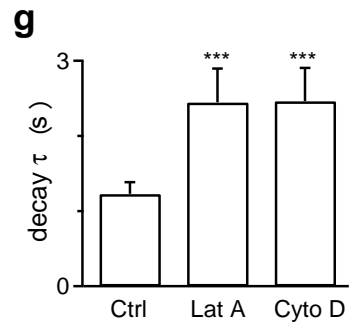

115 **Supplementary Figure 6.** Lat A and Cyto D inhibit  $\Omega$ -shrink fusion, but promote stay fusion  
116 during intracellular calcium dialysis  
117 (a) An example showing that  $\Omega$ -shrink fusion is the majority of fusion events induced by  
118 calcium (1.5  $\mu\text{M}$ ) dialysis in control:  $F_{647}$ ,  $F_{488}$ ,  $W_H$ , and sampled images for two  
119 neighbouring spots (1 and 2) undergoing  $\Omega$ -shrink fusion during calcium dialysis. Data were  
120 taken within 2 min after calcium dialysis (applies to all panels in this figure). Triangles  
121 indicate the time, at which sampled images were taken.  
122 (b) The percentages (mean + s.e.m.) of  $\Omega$ -shrink, stay and close fusion induced by calcium  
123 dialysis in control (n=23 cells, total spot number: 399).  
124 (c-d) Similar arrangements as in panels a-b, respectively, except that Lat A (3  $\mu\text{M}$ ) was added in  
125 the bath solution for 20 min (n=17 cells, total spot number: 157). c: two spots underwent stay  
126 fusion.  
127 (e-f) Similar arrangements as in panels a-b, respectively, except that Cyto D (4  $\mu\text{M}$ ) was added  
128 in the bath solution for 20 min (n=18 cells, total spot number: 157). e: two spots underwent  
129 stay fusion.  
130 (g)  $F_{647}$  decay time constant ( $\tau$ , mean + s.e.m.) for  $\Omega$ -shrink fusion in control (n=276 spots), and  
131 in the presence of Lat A (n=55 spots) or Cyto D (n=51 spots). \*\*\*:  $P < 0.001$ ; unpaired two-  
132 tailed Student's t-test.  
133  
134



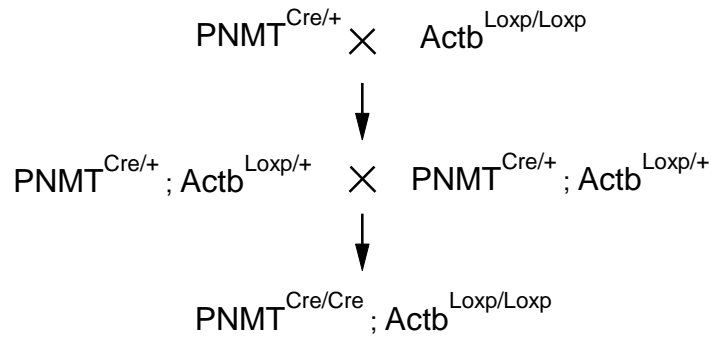

135

136 **Supplementary Figure 7.** Breeding protocol for generating  $PNMT^{Cre/Cre}; Actb^{LoxP/LoxP}$  mice  
 137 ( $Actb^{-/-}$  mice)

138

139  
140

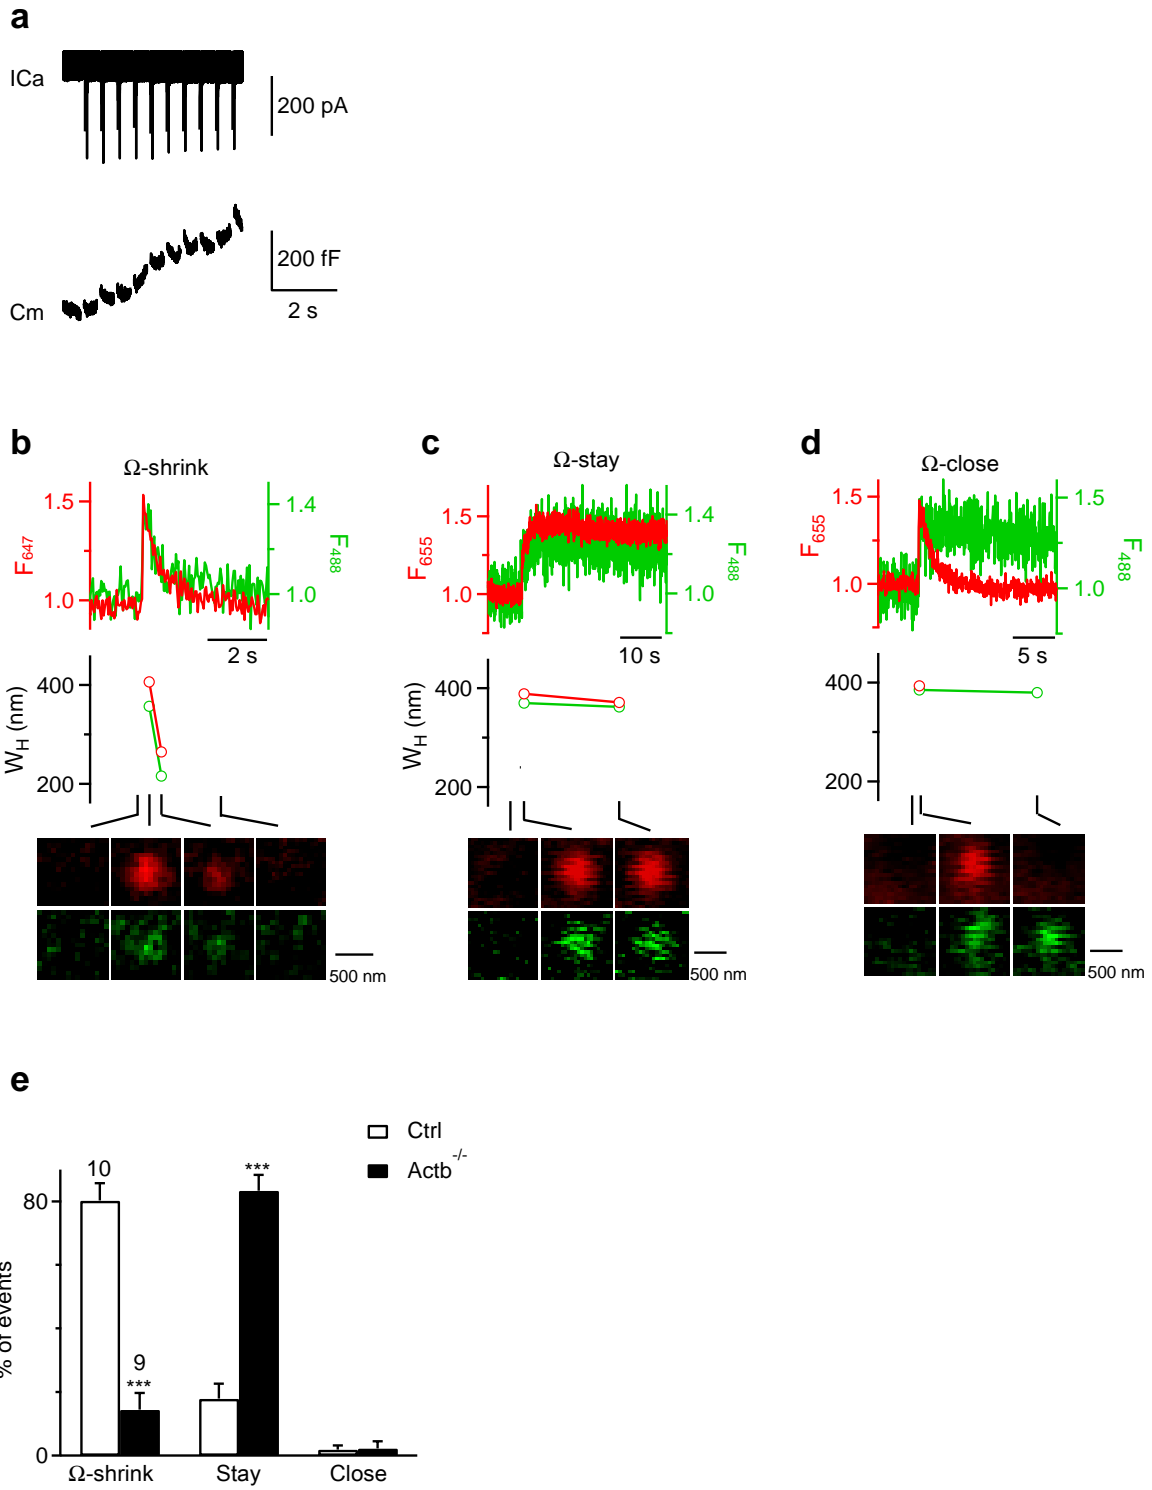

141  
142  
143

144 **Supplementary Figure 8.** Three fusion categories in control and Actb<sup>-/-</sup> mouse chromaffin cells  
145 induced by Train<sub>2Hz</sub>

146 (a) Sampled ICa and the Cm change induced by Train<sub>2Hz</sub> in a wild-type mouse chromaffin cell

147 (b)  $\Omega$ -shrink: A647 fluorescence intensity ( $F_{647}$ , red), A488 fluorescence intensity ( $F_{488}$ , green),  
148  $W_H$ , and sampled images (average of 42 frames) at times indicated (lines), are plotted versus  
149 time for a spot undergoing  $\Omega$ -shrink fusion induced by Train<sub>2Hz</sub> in a wild-type mouse  
150 chromaffin cell. The images were collected every 40 ms at the confocal cell-bottom setting  
151 with A647 and A488 in the bath excited strongly and weakly, respectively.  $F_{647}$  or  $F_{488}$  was  
152 normalized to its mean background value before spots appeared.

153 (c) Stay fusion:  $F_{647}$ ,  $F_{488}$ ,  $W_H$ , and sampled images (average of 10-16 frames) at times indicated  
154 (lines) are plotted versus time for a spot undergoing stay fusion in a wild-type mouse  
155 chromaffin cell.

156 (d) Close fusion:  $F_{647}$ ,  $F_{488}$ ,  $W_H$ , and sampled images (average of 10-16 frames) at times  
157 indicated (lines) are plotted versus time for a spot undergoing close fusion in a wild-type  
158 mouse chromaffin cell.

159 (e) Percentages (mean + s.e.m.) of  $\Omega$ -shrink, stay and close fusion induced by Train<sub>2Hz</sub> in control  
160 (n=10 cells; total spot number: 80) and Actb<sup>-/-</sup> cells (n=9 cells; total spot number: 56; \*\*\*:  $P$   
161 < 0.001, two-tailed Student's t test).

162  
163  
164  
165  
166  
167  
168  
169  
170  
171  
172  
173  
174  
175  
176  
177  
178  
179  
180  
181  
182  
183  
184  
185  
186  
187  
188  
189

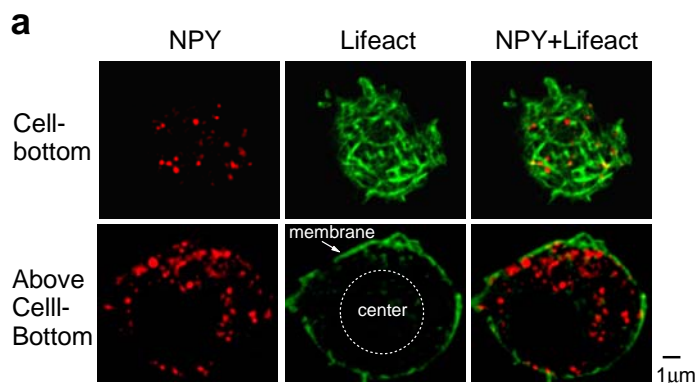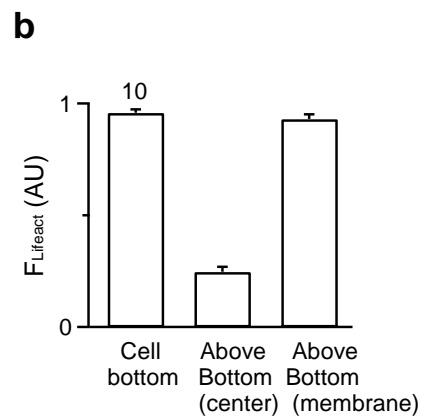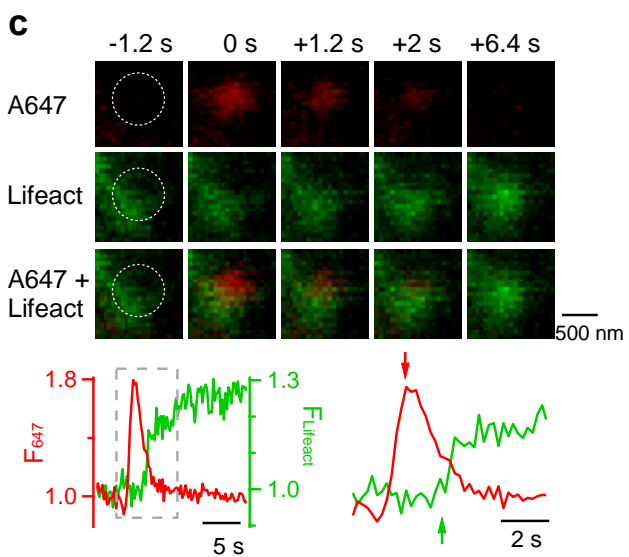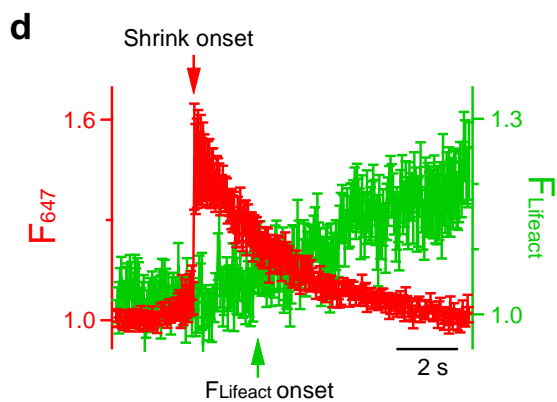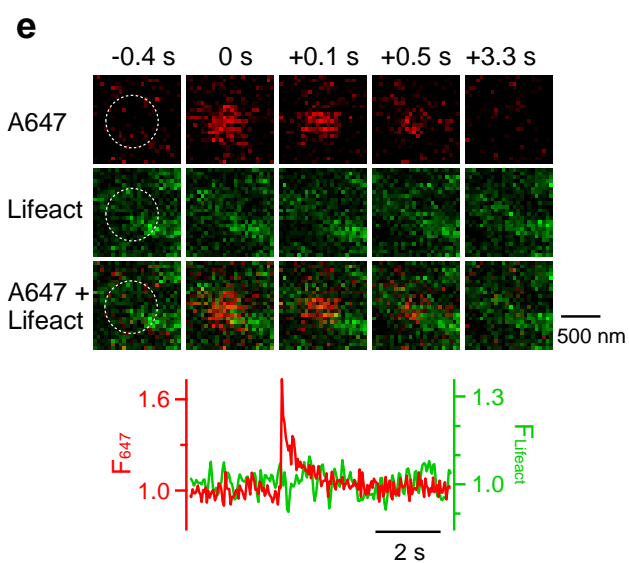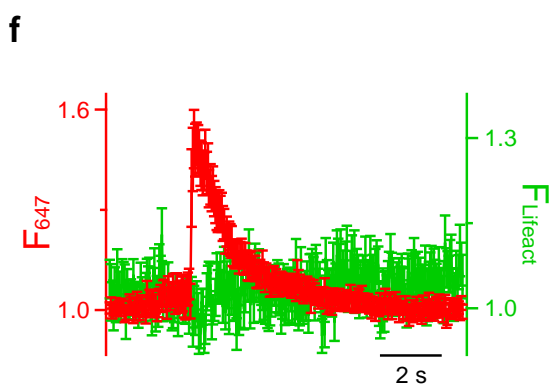

191 **Supplementary Figure 9.** Dense F-actin network at the plasma membrane does not move, or  
192 move with a delay, towards the shrinking  $\Omega$ -profile

193 (a) Sampled STED images of a cell overexpressing NPY-mCherry (left, red) and Lifeact  
194 (middle, green) at the cell-bottom (upper panels) and above cell-bottom  
195 ( $\sim 2.5 \mu\text{m}$  above, lower panels). Left and middle images are superimposed in the right.

196 (b)  $F_{\text{Lifeact}}$  (mean + s.e.m.) at the cell-bottom membrane (10 cells, e.g., panel a, upper image),  
197 above-cell-bottom center region at least  $1 \mu\text{m}$  away from plasma membrane  
198 (10 cells, e.g., dotted circle in panel a) and above-cell-bottom membrane  
199 (10 cells, e.g., arrow in panel a).

200 (c) Images: simultaneous confocal imaging of A647 (bath, top) and Lifeact (middle, Lifeact was  
201 overexpressed) at the cell-bottom shows a gradual increase of Lifeact fluorescence (actin  
202 increases) as the A647 spot shrank. Top and middle panels are superimposed in the bottom  
203 (applies to panel e). The times labelled are relative to the time at which the A647 spot  
204 reached the peak intensity (defined as time 0).

205 Traces:  $F_{647}$  and  $F_{\text{Lifeact}}$  of the dotted circle indicated in the upper panel are plotted versus  
206 time (left). The dotted box in left is expanded in the right to indicate a delay of  $F_{\text{Lifeact}}$   
207 increase (green arrow) as compared to  $F_{647}$  decrease (red arrow).

208 (d) The averaged  $F_{647}$  and  $F_{\text{Lifeact}}$  from 15 fusion spots undergoing  $\Omega$ -shrink fusion  
209 (mean  $\pm$  s.e.m). The traces were aligned at the onset of A647 spot appearance. Arrows  
210 indicate  $F_{\text{Lifeact}}$  increase (green arrow) is delayed as compared to  $F_{647}$  decrease (red arrow).

211 (e-f) Similar to panel c-d, respectively, but for  $\Omega$ -shrink fusion spots with no clear  $F_{\text{Lifeact}}$   
212 increase. f, n = 22 spots.

213  
214  
215  
216  
217  
218  
219  
220  
221  
222  
223  
224  
225  
226  
227

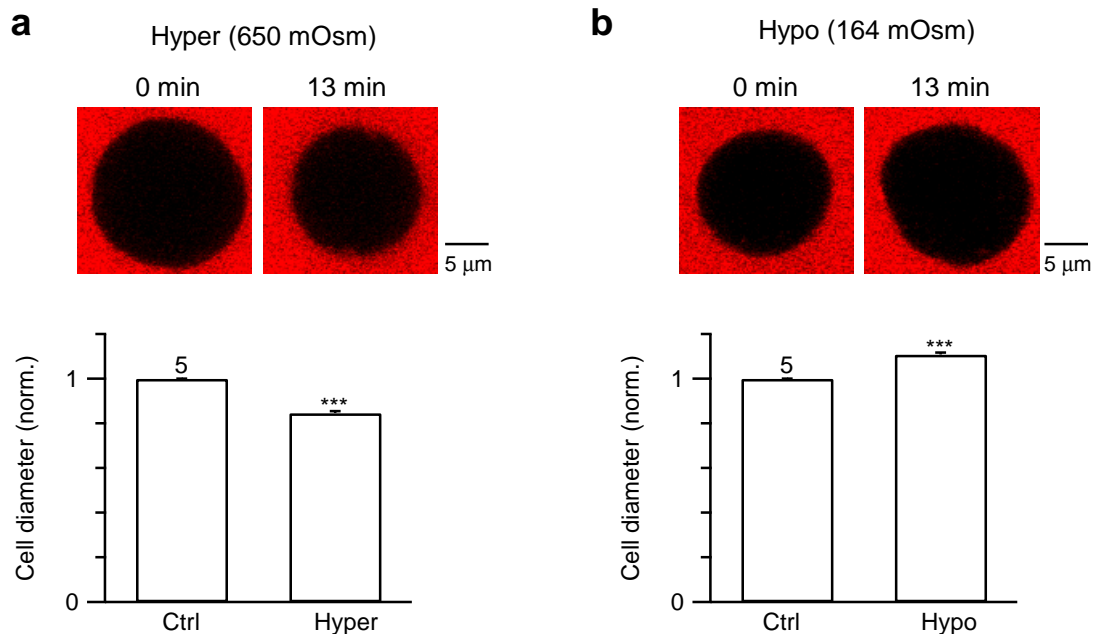

228  
 229 **Supplementary Figure 10.** Hyper-osmotic and hypo-osmotic solution shrinks and enlarges  
 230 chromaffin cells, respectively

231 Cells shrink or enlarge in hyper-osmotic (650 mOsm, Hyper) or hypo-osmotic (164 mOsm)  
 232 solution, respectively

233 (a) Upper: A sampled cell imaged at the cell-center ( $>2 \mu\text{m}$  above cell-bottom) before  
 234 (0 min, 305 mOsm) and 13 min after application of the hyper-osmotic solution (Hyper, 650  
 235 mOsm). A647 was included in the bath solution for labeling cell outline.

236 Lower: Cell diameter in control (Ctrl, before hyper-osmotic application, 305 mOsm) and in  
 237 hyper-osmotic solution (Hyper, 650 mOsm). Data are normalized to the Ctrl and expressed as  
 238 mean + s.e.m. ( $n = 5$  cells, \*\*\*:  $P < 0.001$ , two-tailed paired Student's t-test).

239 (b) Similar to panel a, except that the hyper-osmotic solution was replaced with hypo-osmotic  
 240 solution (Hypo, 164 mOsm). Data are normalized to the Ctrl and expressed as mean + s.e.m.  
 241 ( $n = 5$  cells, \*\*\*:  $P < 0.001$ , two-tailed paired Student's t-test).

242  
 243  
 244  
 245  
 246  
 247  
 248  
 249  
 250  
 251  
 252  
 253  
 254  
 255

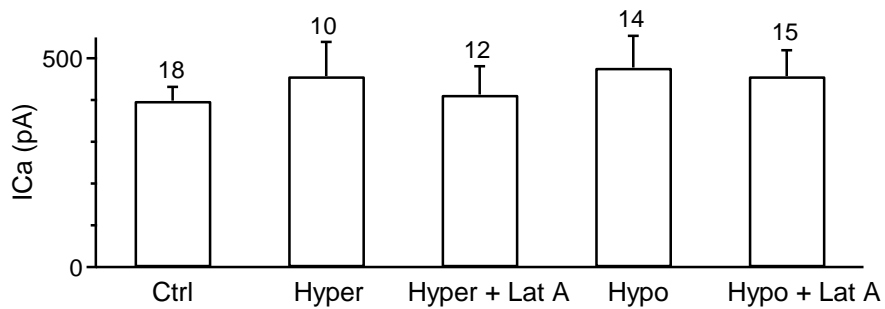

257

258

259

**Supplementary Figure 11.** Changes in the osmolarity of extracellular solution do not affect ICa

260

261

262

263

264

265

266

267

268

269

The amplitude (mean + s.e.m) of the ICa induced by Train<sub>2Hz</sub> in control (Ctrl, n = 18 cells), hyper-osmotic solution (Hyper, 650 Osm, n = 10 cells,  $P = 0.4264$ ), hyper-osmotic solution plus Lat A (Hyper + Lat A, n = 12 cells,  $P = 0.8252$ ), hypo-osmotic solution (Hypo, 164 Osm, n = 14 cells,  $P = 0.3028$ ), hypo-osmotic solution plus Lat A (Hypo + Lat A, n = 15 cells,  $P = 0.3763$ ). ICa amplitude was measured from the first 50 ms pulse during Train<sub>2Hz</sub>. When Lat A (3  $\mu$ M) was added, cells were pre-treated for at least 10 min before exposed to hyper-osmotic or hypo-osmotic solution in the presence of Lat A. Statistical significances were assessed by unpaired two-tailed Student's t-test.

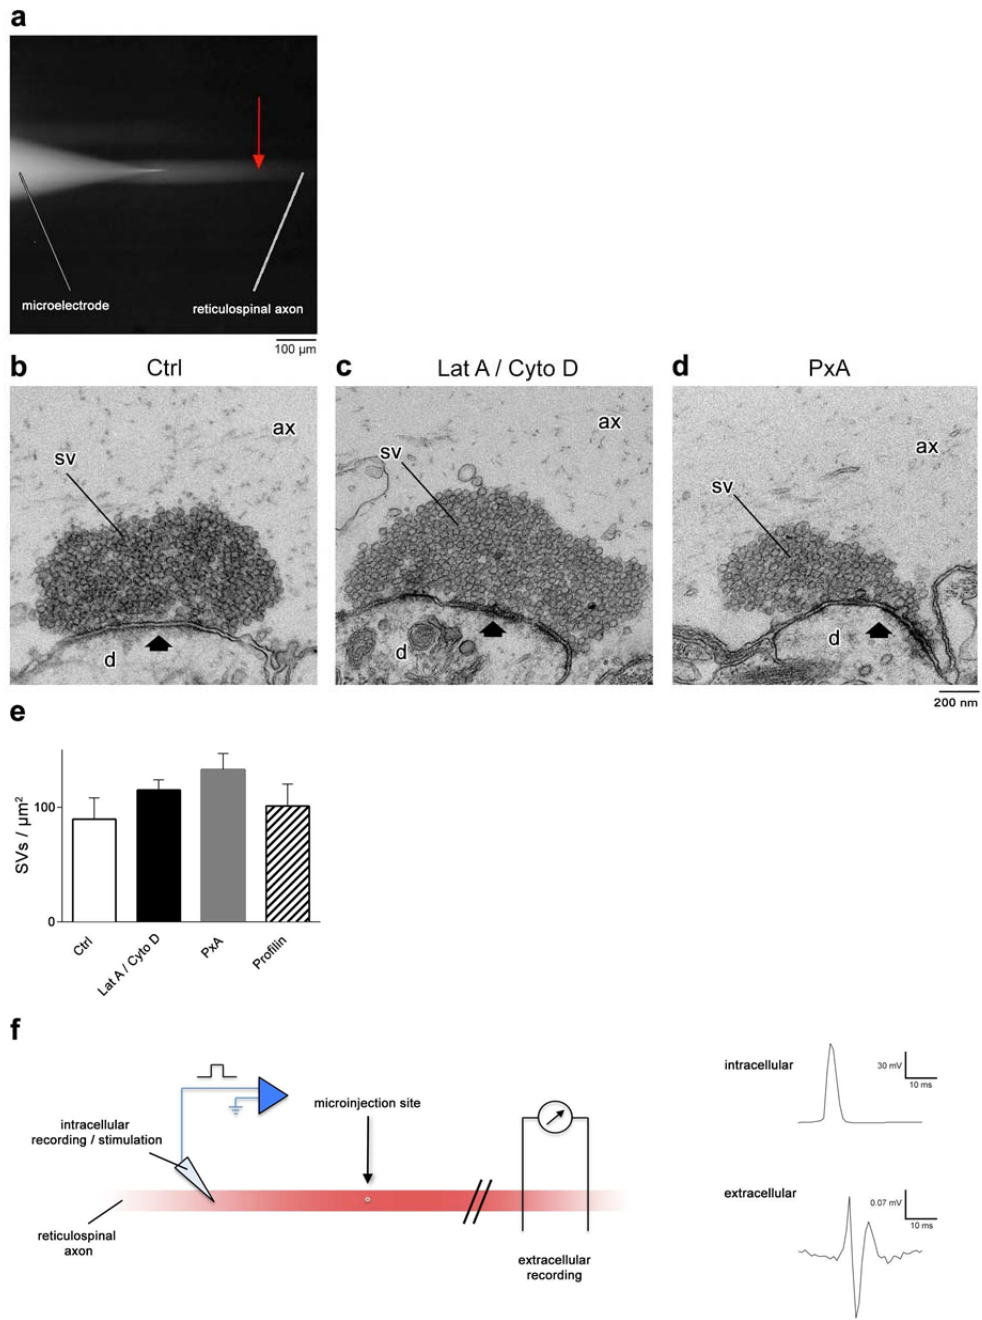

270  
271  
272



273 **Supplementary Figure 12.** Microinjections of actin-directed compounds did not affect active  
274 zone morphology or action potential propagation

275 (a) A CCD camera image of a reticulospinal axon in the lamprey spinal cord microinjected with  
276 Lat A/Cyto D and Texas Red. The axon was labeled with Texas Red (horizontal cylinder like  
277 structure as indicated). Texas Red fluorescence intensity decayed gradually from left, the  
278 injection site), to the right along the axon. Red arrow indicates the place where we examined  
279 the tissue at the EM level. At this location, Texas Red fluorescence intensity was ~10 times  
280 lower than in the tip of micropipette, suggesting that the concentration of Lat A/Cyto D was  
281 ~10 times lower than in the micropipette.

282 (b-d) Electron microscopic images of vesicle clustering at the active zone of a control axon (b),  
283 an axon microinjected with Lat A/Cyto D (c), or an axon microinjected with PxA (d). Axons  
284 were stimulated at 5 Hz for 30 min. Note normal morphology of the axoplasmic matrix (ax)  
285 and an accumulation of synaptic vesicles (sv) at active zones (thick arrows) and clathrin-  
286 coated pits around the active zone in (b). d, postsynaptic dendrite. The active zone with  $\Omega$ -  
287 shape profiles from the synapse shown in (d) is depicted in Fig. 6e at higher magnification.

288 (e) Bar graph showing the number of vesicles at the active zone (AZ) within 50 nm from the  
289 presynaptic membrane in control axons (no microinjection) and in axons microinjected with  
290 Lat A/Cyto D, PxA or profilin I. Data were plotted as (mean + s.e.m.)/( $\mu\text{m}^2$  AZ). The axon  
291 was fixed after action potential stimulation at 5 Hz for 30 min. Each group of data was from  
292 5 synapses cut in serial section from 3 microinjected axons. The one-way analysis of  
293 variance (ANOVA) was used to test statistical difference between the means, alpha level of  
294 0.05, followed by Holm-Šídák's test. Differences between the means were not significant.  $P$   
295  $> 0.05$  ( $P = 0.7184$  for Ctrl vs. Lat A/Cyto D,  $P = 0.3551$  for Ctrl vs. PxA,  $P = 0.8206$  for  
296 Ctrl vs. profilin).

297 (f) Left: schematics illustrating an experiment, in which the ability of a reticulospinal axon to  
298 propagate actin potentials following microinjection of a mixture of Lat A/Cyto D and Texas  
299 Red was tested. Action potential was induced by intracellular stimulation of axons rostral to  
300 the microinjection (intracellular recording/stimulation).

301 Right: Action potential recorded intracellularly (upper) successfully propagated through the  
302 site of microinjections and were recorded extracellularly at 5 cm away at the caudal part of  
303 the spinal cord preparation (extracellular recording), confirming that microinjection of Lat  
304 A/Cyto D did not affect action potential propagation along the axon.

305  
306  
307  
308  
309  
310  
311  
312  
313  
314  
315  
316  
317  
318

319  
320  
321  
322  
323  
324  
325  
326  
327  
328  
329  
330  
331  
332  
333  
334  
335  
336  
337  
338  
339  
340  
341  
342  
343  
344  
345  
346  
347  
348  
349  
350  
351  
352  
353  
354  
355  
356  
357  
358  
359  
360  
361  
362

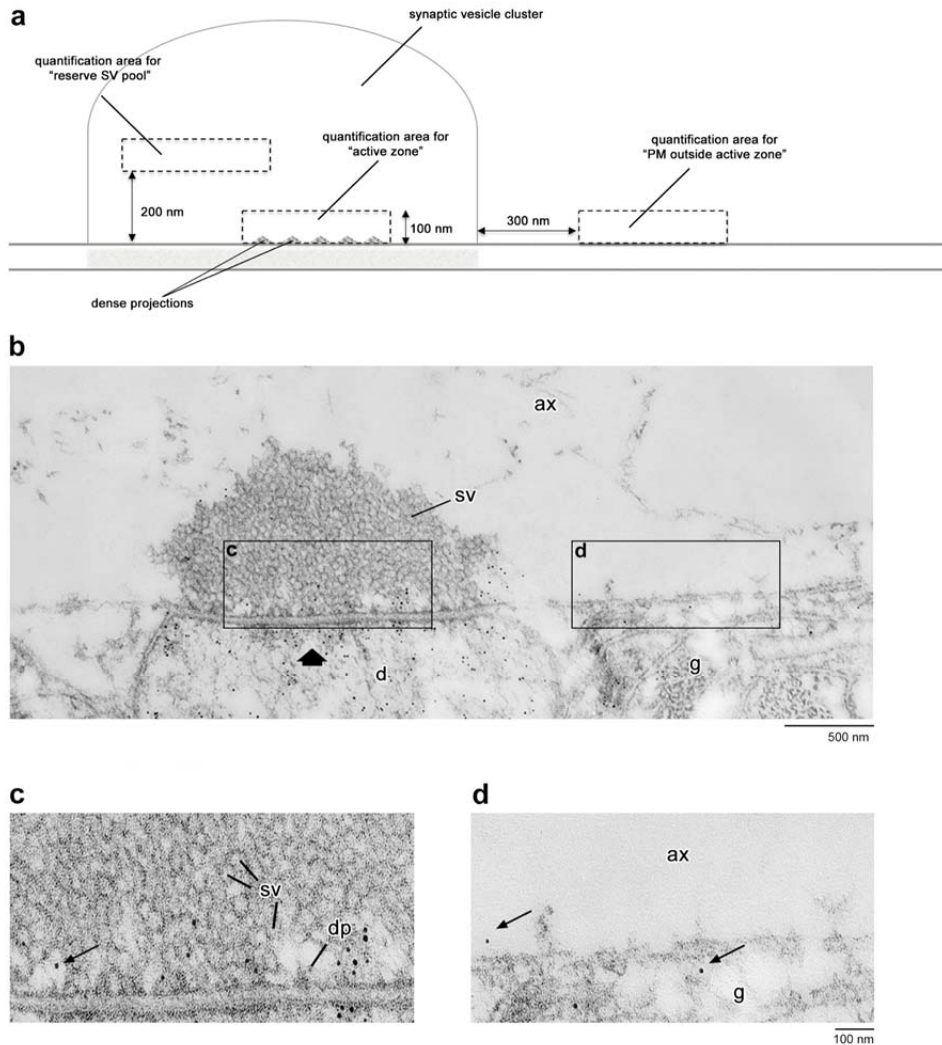

**Supplementary Figure 13.** Quantification of immunogold labeling of actin at the giant reticulospinal synapse in lamprey

- (a) Schematics showing three areas where we quantified actin immunogold particles: active zone, PM outside active zone, and the reserve pool. Results of quantifications are shown in Fig. 6j.
- (b) Electron micrograph of a giant reticulospinal synapse labeled with monoclonal actin antibody. Boxed areas outline actin labeling at the active zone (thick arrow) and at the presynaptic membrane outside the active zone (PM outside active zone). Box c and box d are enlarged in panel c and d, respectively. ax, axoplasmic matrix; sv, synaptic vesicles; d, dendrite; g, glia; dp, dense projection.
- (c-d) Box c and d in panel b are shown at higher magnification in panel c and d, respectively. Note higher density of gold particles at the synaptic active zone (c) than at the presynaptic membrane outside the synaptic area (d). Thin arrows point at gold particles.

363  
364  
365  
366  
367  
368  
369  
370  
371  
372  
373  
374  
375  
376  
377  
378  
379  
380  
381  
382  
383  
384  
385  
386  
387  
388  
389  
390  
391  
392  
393  
394  
395  
396  
397

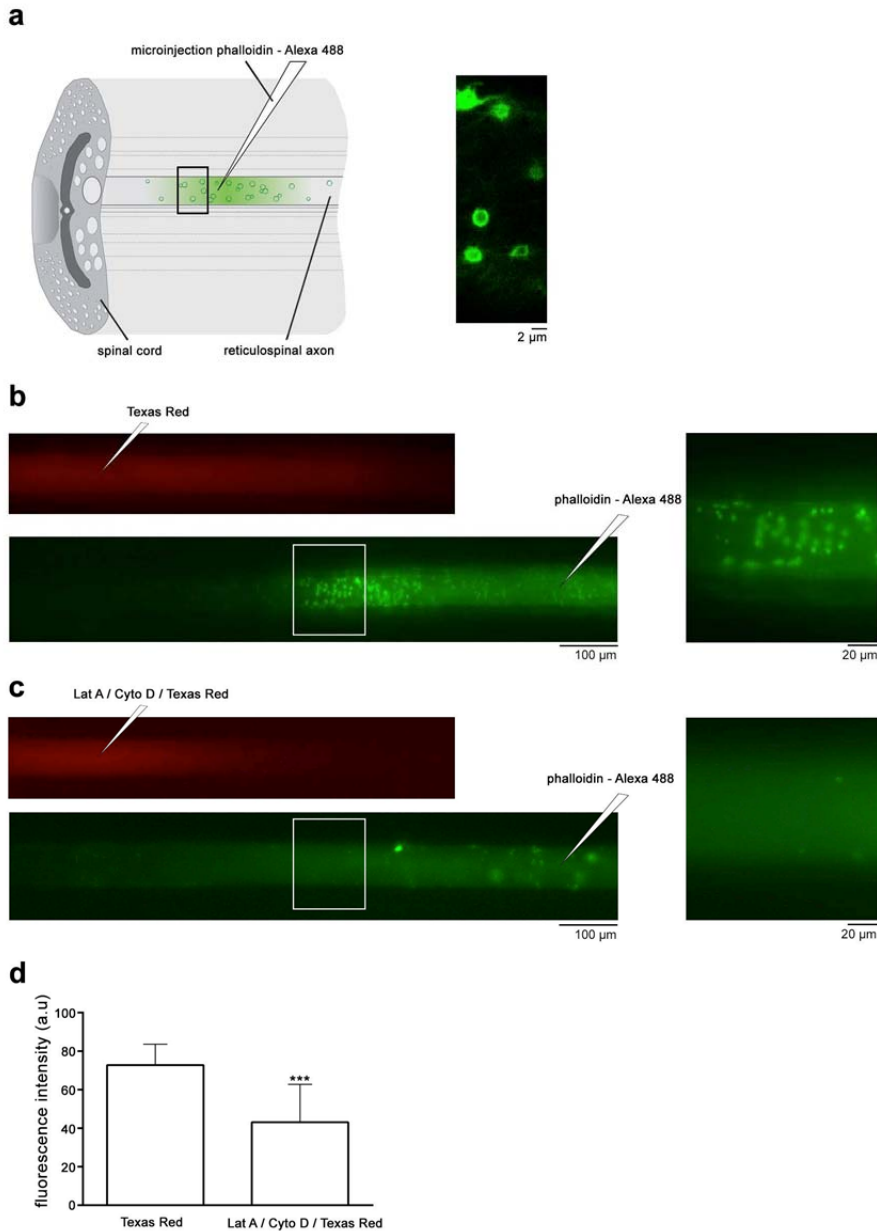

398 **Supplementary Figure 14. Lat A/Cyto D reduces F-actin at giant lamprey axon**

- 399 (a) Left: A schematic drawing illustrating microinjection of phalloidin-Alexa 488 into a  
400 reticulospinal axon. The boxed area marks an area where we examined the injected  
401 phalloidin-Alexa 488 fluorescence with a confocal microscope, as shown in the right.  
402 Right: Confocal optical section shows the surface of a living axon injected with phalloidin-  
403 Alexa 488 and imaged with a 100x/1.0 NA objective. Each spot of phalloidin-Alexa 488  
404 fluorescence indicates a F-actin spot. The results are consistent with a previous work<sup>1</sup>  
405 showing that each F-actin spot corresponds to an active zone and its corresponding  
406 periaxonal zone.  
407 (b) Control experiment: the axon was stimulated at 5 Hz and microinjected first with Texas Red  
408 only (red channel). 10 min later, phalloidin-Alexa 488 (green channel) was injected into the  
same axon ~800  $\mu\text{m}$  away. CCD camera images of the axon were collected with a 10x air

409 objective at 10-15 min after phalloidin-Alexa 488 injection (left). The boxed area was  
410 imaged again, but with a 40x water immersion objective (0.8 N.A.) and shown in the right.  
411 (c) Similar to panel b, except that Texas Red was replaced with Lat A/Cyto D plus Texas Red.  
412 The phalloidin-Alexa 488 puncta numbers and intensity were less than panel b.  
413 (d) Bar graph showing a reduction in fluorescence intensity (mean + s.e.m., arbitrary units, a.u.)  
414 of the phalloidin-Alexa 488 spots (F-actin spots) in the presence of Texas Red alone  
415 (control, 29 spots, 2 axons) or in the presence of Lat A/Cyto D and Texas Red (15 spots, 2  
416 axons). The data were taken from the box area described in panels b and c, ~300-500  $\mu$ m  
417 from the phalloidin-Alexa 488 injection site. \*\*\* $P < 0.001$ , two-tailed Student's t-test.  
418  
419

420

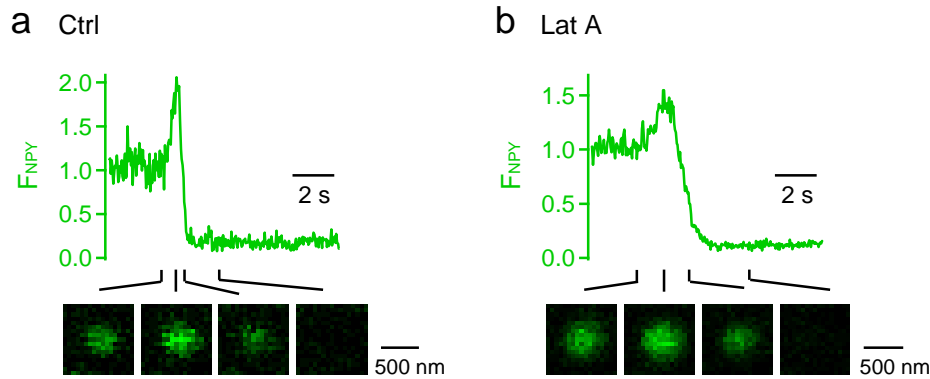

421

422

423

424 **Supplementary Figure 15.** Lat A increases the duration of NPY-EGFP release in chromaffin  
425 cells

426 (a-b) Sampled release time course of NPY-EGFP fluorescence ( $F_{\text{NPY}}$ ) in control (a) and in the  
427 presence of Lat A (b). The NPY-EGFP images at times indicated are also shown. The initial  
428 increase of NPY-EGFP fluorescence is due to fusion pore opening that increases the  
429 vesicular lumen pH. The stimulation was  $\text{Train}_{2\text{Hz}}$ .

430 Conclusion: The NPY-EGFP release time, measured as the time at which NPY-EGFP spot  
431 fluorescence decreased by 50%, was significantly longer in the presence of Lat A  
432 ( $1.3 \pm 0.2$  s,  $n = 84$  spots, 27 cells) than in control ( $0.8 \pm 0.1$  s,  $n = 80$  spots, 21 cells)  
433 (unpaired t-test,  $P = 0.013$ ).

434

435

436

### 437 **Supplementary References**

438

439 1. Evergren, E. *et al.* Intersectin is a negative regulator of dynamin recruitment to the synaptic  
440 endocytic zone in the central synapse. *J. Neurosci.* **27**, 379-390 (2007).

441

442
